# Supplementary material for: Tailoring the catalytic activity of nickel sites in NiFe2O4 by cobalt substitution for highly enhanced oxygen evolution reaction
Source: Royal Society of Chemistry journal article supplement (doi:10.1039/d1se00318f), 2021-01-01
Supplement: d1se00318f1.pdf [file d1se00318f1.pdf]

**Tailoring the catalytic activity of nickel sites in NiFe<sub>2</sub>O<sub>4</sub> by cobalt substitution for highly enhanced oxygen evolution reaction**

Zhe Zhang,<sup>a</sup> Xiaodong Yan,<sup>\*a</sup> Jiangyong Liu,<sup>b</sup> Bing Liu,<sup>\*a</sup> Zhi-Guo Gu<sup>a,c</sup>

<sup>a</sup> Key Laboratory of Synthetic and Biological Colloids, Ministry of Education, School of Chemical and Material Engineering, Jiangnan University, Wuxi 214122, China

<sup>b</sup> School of Chemistry and Chemical Engineering, Yangzhou University, Yangzhou 225002, China

<sup>c</sup> International Joint Research Center for Photoresponsive Molecules and Materials, School of Chemical and Material Engineering, Jiangnan University, Wuxi 214122, China

E-mail: [xiaodong.yan@jiangnan.edu.cn](mailto:xiaodong.yan@jiangnan.edu.cn); [liubing@jiangnan.edu.cn](mailto:liubing@jiangnan.edu.cn)

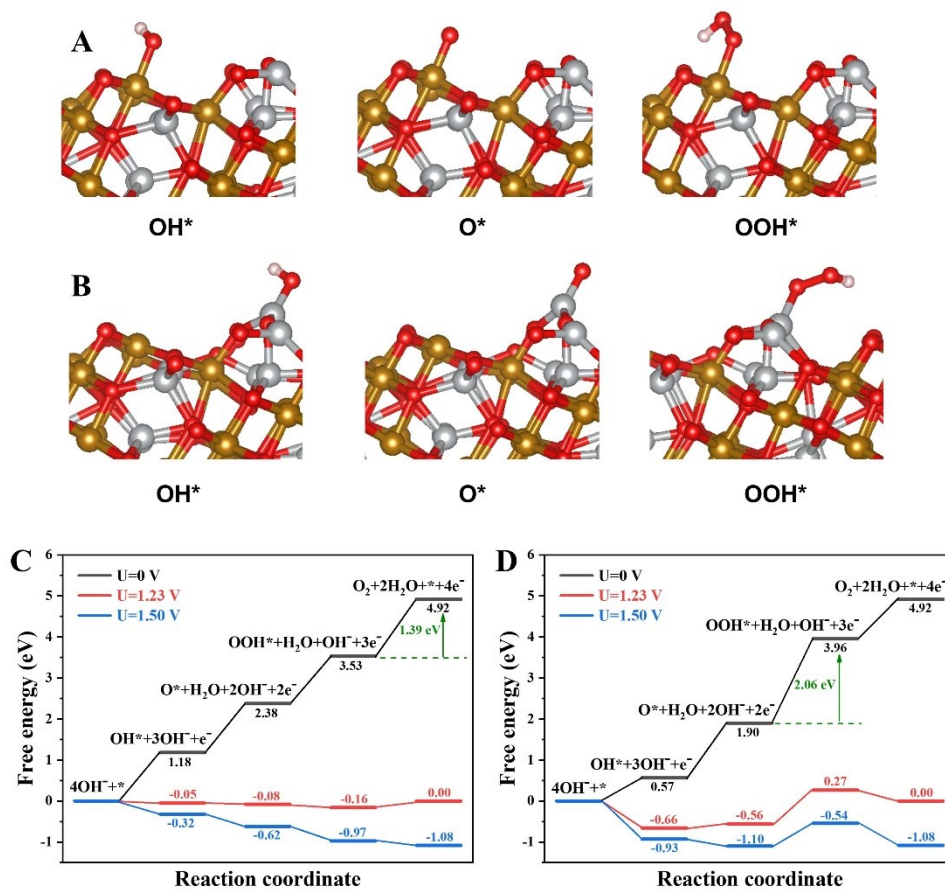

Fig. S1. DFT-calculated structures of reaction intermediates during the OER on the (A) Fe site of NiFe<sub>2</sub>O<sub>4</sub> and Ni site of NiFe<sub>2</sub>O<sub>4</sub>. Free energy profiles for the OER over NiFe<sub>2</sub>O<sub>4</sub> at zero potential ( $U = 0$ ), equilibrium potential ( $U = 1.23$  V), and practical potential ( $U = 1.50$  V): (C) Fe sites and (D) Ni sites.

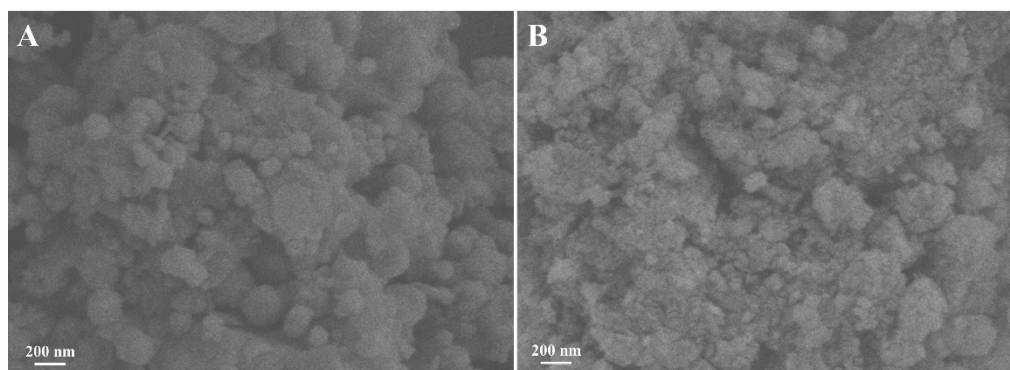

Fig. S2 SEM images of NiFe<sub>2</sub>O<sub>4</sub> and Ni<sub>0.98</sub>Co<sub>0.02</sub>Fe<sub>2</sub>O<sub>4</sub>.

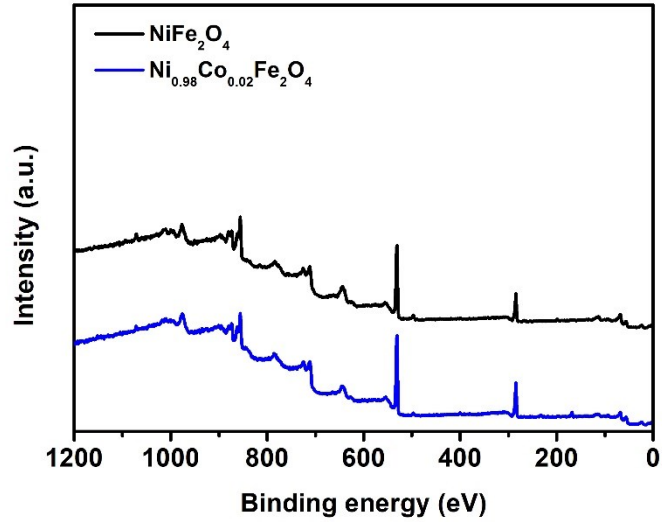

Fig. S3 XPS survey spectra of  $\text{NiFe}_2\text{O}_4$  and  $\text{Ni}_{0.98}\text{Co}_{0.02}\text{Fe}_2\text{O}_4$ .

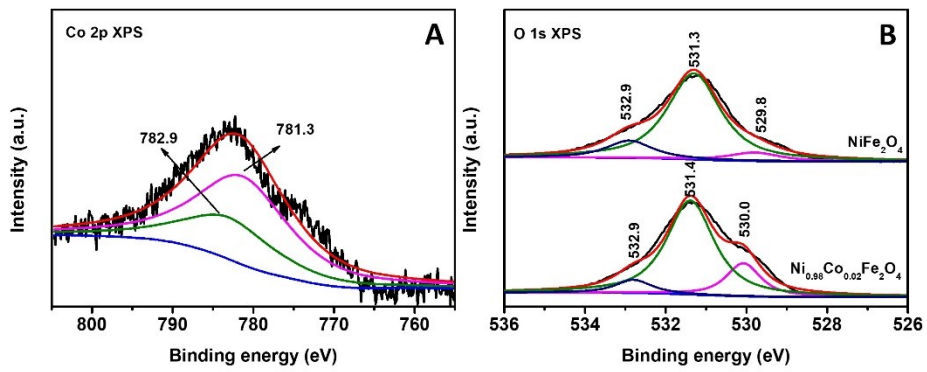

Fig. S4 (A) Co 2p and (B) O 1s XPS spectra of  $\text{Ni}_{0.98}\text{Co}_{0.02}\text{Fe}_2\text{O}_4$ .

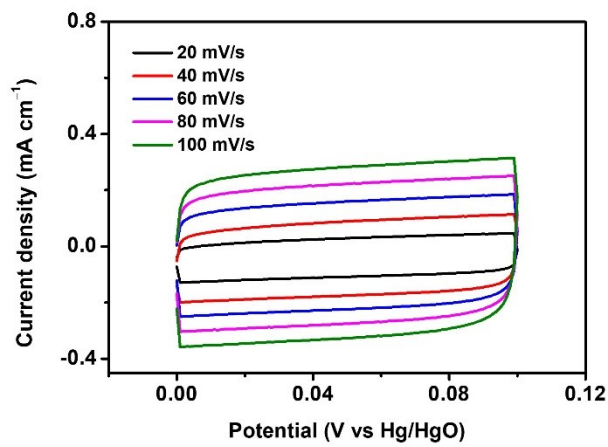

Fig. S5 CV curves of the  $\text{NiFe}_2\text{O}_4$  electrode at various scan rates.

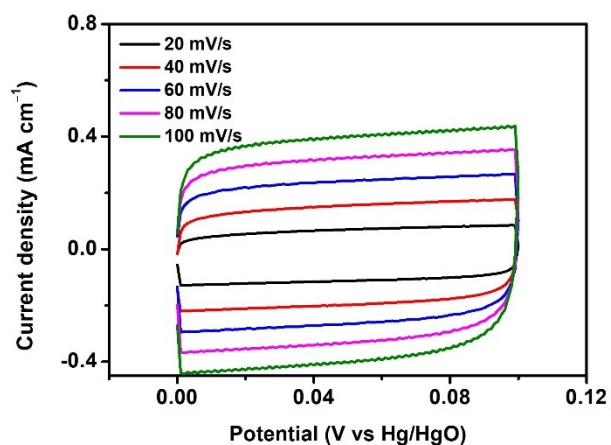

Fig. S6 CV curves of the  $\text{Ni}_{0.99}\text{Co}_{0.01}\text{Fe}_2\text{O}_4$  electrode at various scan rates.

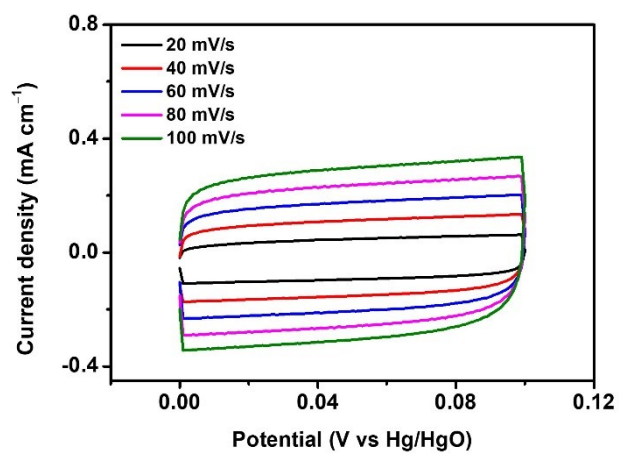

Fig. S7 CV curves of the  $\text{Ni}_{0.98}\text{Co}_{0.02}\text{Fe}_2\text{O}_4$  electrode at various scan rates.

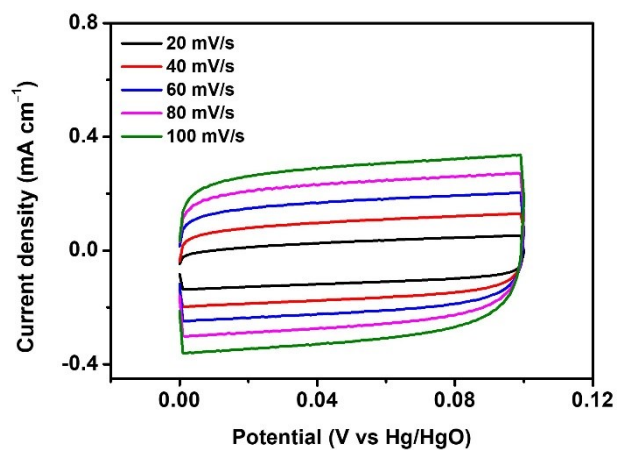

Fig. S8 CV curves of the  $\text{Ni}_{0.95}\text{Co}_{0.05}\text{Fe}_2\text{O}_4$  electrode at various scan rates.

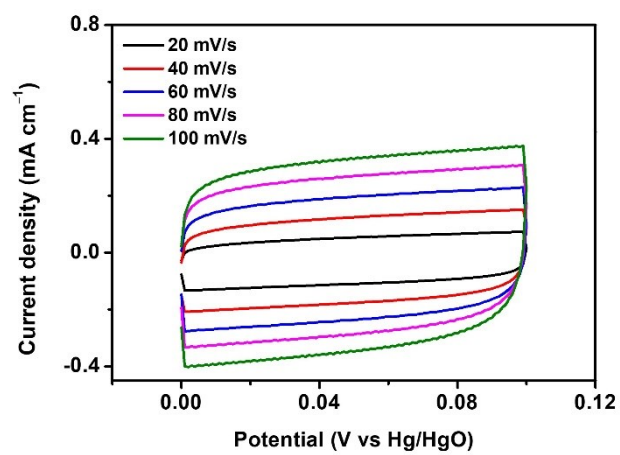

Fig. S9 CV curves of the  $\text{Ni}_{0.9}\text{Co}_{0.1}\text{Fe}_2\text{O}_4$  electrode at various scan rates.
